# Supplementary material for: Combination of RAD001 (everolimus) and docetaxel reduces prostate and breast cancer cell VEGF production and tumour vascularisation independently of sphingosine-kinase-1
Source: PubMed Central journal article supplement (PMC5471177; doi:10.1038/s41598-017-03728-3), 2017-06-14
Supplement: 41598_2017_3728_MOESM1_ESM.pdf [file 41598_2017_3728_MOESM1_ESM.pdf]

## Combination of RAD001 (everolimus) and docetaxel reduces prostate and breast cancer cell VEGF production and tumour vascularisation independently of sphingosine-kinase-1

Heba Alshaker<sup>1,2\*</sup>, Qi Wang<sup>1</sup>, Torsten Böhler<sup>3</sup>, Robert Mills<sup>4</sup>, Mathias Winkler<sup>3</sup>, Tawfiq Arafat<sup>2</sup>, Yoshiaki Kawano<sup>5</sup>, Dmitri Pchejetski<sup>1\*</sup>

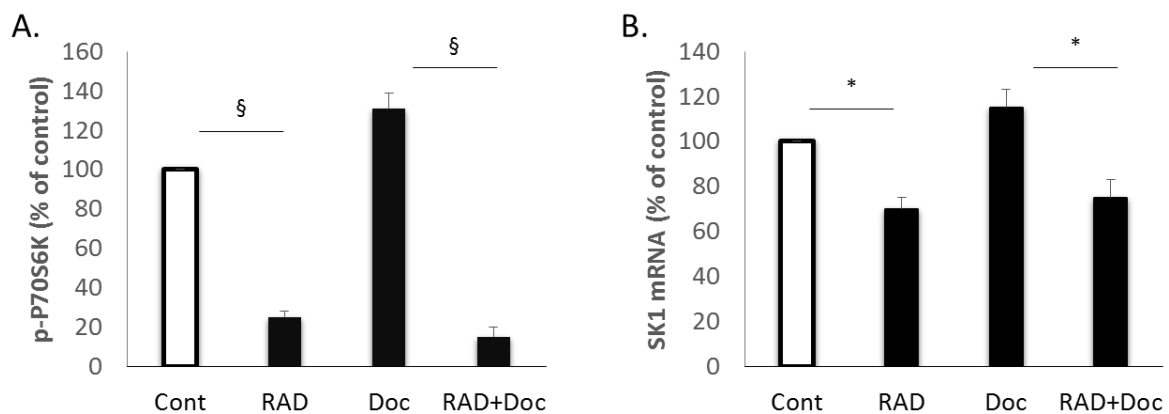

**Figure S1. RAD001 but not docetaxel decreases SK1 expression in BT-549 cells.** BT-549 cells were starved overnight then incubated with 0.1% DMSO (Cont), 100nM RAD001 (RAD), 5nM docetaxel (Doc) and the combination of these drugs (RAD+Doc) for 24h. **A.** P70S6K phosphorylation was measured using ELISA. **B.** SK1 mRNA expression was determined by qRT-PCR. Columns, mean of three independent experiments performed in triplicate; bars, SEM. (\*,  $P < 0.05$ ; §,  $P < 0.001$ ; ns, not significant,  $P > 0.05$ ).

**Figure S2. RAD001 decreases P70S6K phosphorylation in MDA-MB-231.** MDA-MB-231 cells were starved overnight then incubated with 0.1% DMSO (Cont), 100nM RAD001 (RAD), 5nM docetaxel (Doc) and the combination of these drugs (RAD+Doc) for 24h. Cell extracts were loaded on acrylamide mini gel and probed for phosphorylation of P70S6K and GAPDH.

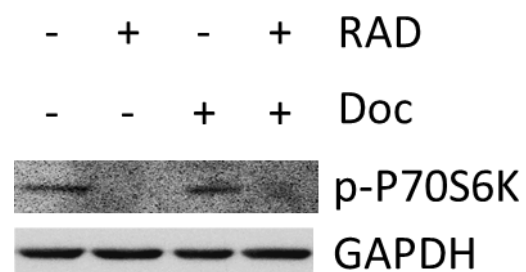

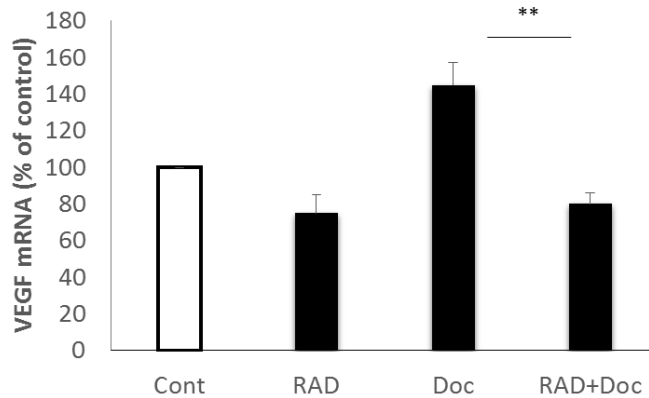

**Figure S3. RAD001 but not docetaxel decreases VEGF expression in BT-549 cells.** BT-549 cells were starved overnight then incubated with 0.1% DMSO (Cont), 100nM RAD001 (RAD), 5nM docetaxel (Doc) and the combination of these drugs (RAD+Doc) for 24h. VEGF mRNA expression was determined by qRT-PCR. Columns, mean of three independent experiments performed in triplicate; bars, SEM. (\*,  $P < 0.05$ ; \*\*,  $P < 0.01$ ; §,  $P < 0.001$ ; ns, not significant,  $P > 0.05$ ).

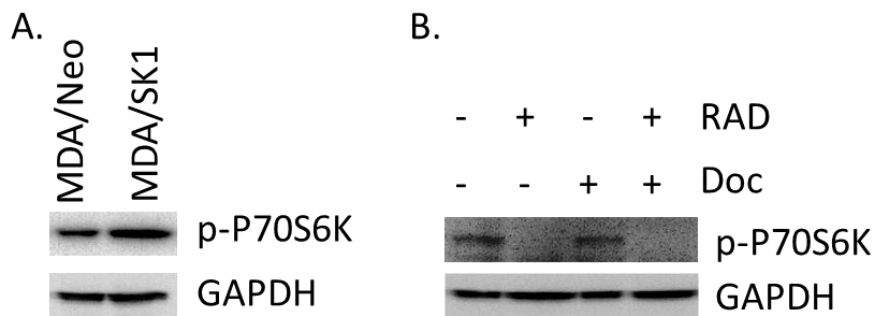

**Figure S4. SK1 overexpression does not block RAD001-mediated inhibition of mTOR in MDA-MB-231 cells.** **A.** Cell extracts for empty vector-transfected MDA-MB-231 cells (MDA/Neo) and MDA-MB-231 cells stably transfected with human SK1 (MDA/SK1) were loaded on acrylamide mini gel and probed for p-P70S6K and GAPDH. **B.** MDA/SK1 cells were starved overnight then incubated with 0.1% DMSO (Cont), 100nM RAD001 (RAD), 5nM docetaxel (Doc) and the combination of these drugs (RAD+Doc) for 24h. Cell extracts were loaded on acrylamide mini gel and probed for p-P70S6K and GAPDH.

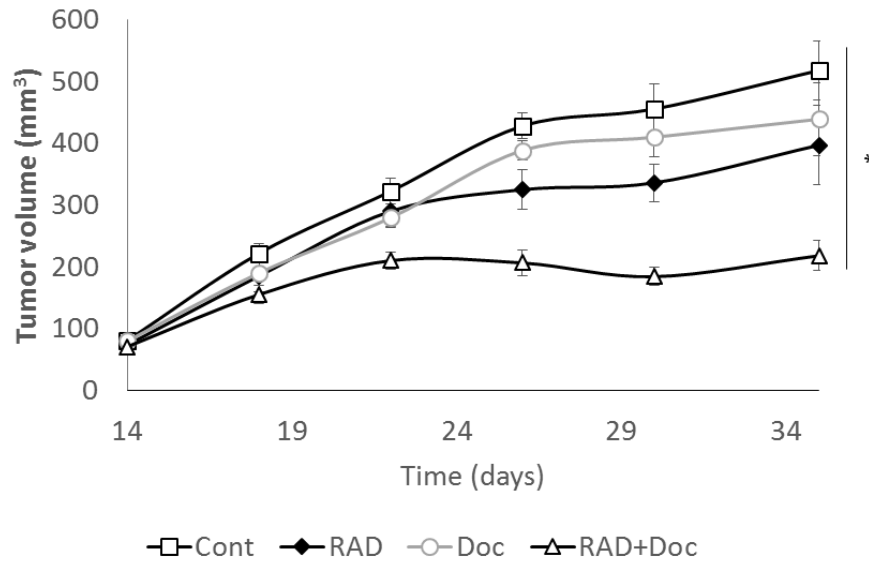

**Figure S5. RAD001 decreases tumour growth in mouse model of human prostate cancer.** Subcutaneous PC3 tumours were established in nude mice as described in materials and methods and allowed to grow for two weeks. Mice were treated with sham (Cont), 5mg/kg RAD001 (RAD), 5mg/kg docetaxel (Doc) and combination of these drugs (RAD+Doc) for three weeks. Tumour sizes were measured every 4 days and volumes calculated as  $\frac{4}{3} \times 3.14 \times a \times c^2$  where a is a long diameter and c is a short diameter. Columns, mean values of n=8; bars, SEM. (\*, P<0.05; \*\*, P<0.01; §, P<0.001; ns, not significant, P>0.05).

**Table S1. Patient characteristics with clinicopathological parameters of oestrogen receptor (ER)-negative breast cancer patients**

| <b>Characteristics</b>              | <b>Patients (n[%])</b> |
|-------------------------------------|------------------------|
| <b>Age (Years)</b>                  |                        |
| 30-39                               | 6 [20]                 |
| 40-49                               | 7 [23]                 |
| 50-59                               | 8 [27]                 |
| ≥60                                 | 9 [30]                 |
| <b>Nodal status</b>                 |                        |
| 1-3                                 | 16 [53]                |
| ≥4                                  | 14 [47]                |
| <b>Tumour size (mm)</b>             |                        |
| 0-20                                | 13 [43]                |
| 21-50                               | 12 [40]                |
| ≥51                                 | 5 [17]                 |
| <b>Tumour grade</b>                 |                        |
| II                                  | 6 [20]                 |
| III                                 | 24 [80]                |
| <b>Progesterone receptor status</b> |                        |
| Positive                            | 5 [17]                 |
| Negative                            | 25 [83]                |
| <b>HER2 status</b>                  |                        |
| Positive                            | 10 [33]                |
| Negative                            | 20 [67]                |
| <b>Histologic type</b>              |                        |
| Invasive ductal carcinoma           | 30 [100]               |
